# Supplementary material for: Evaluation of farmers friendly IPM modules for the management of fall armyworm, Spodoptera frugiperda (JE Smith) in maize in the hot semiarid region of India
Source: PubMed Central journal article supplement (PMC10966016; doi:10.1038/s41598-024-57860-y), 2024-03-26
Supplement: 41598_2024_57860_MOESM1_ESM.pdf [file 41598_2024_57860_MOESM1_ESM.pdf]

**Entomological Society of India, Division of Entomology, ICAR- IARI, New Delhi. Survey Proforma  
for Farmers' Perception on Fall Armyworm, *Spodoptera frugiperda* (J.E. Smith) Invasion in India**

|            |  |  |  |
|------------|--|--|--|
| Farmer No. |  |  |  |
|------------|--|--|--|

**A: Farmer identification**

| Q. No. | Farmer identification                          | Response | Q. No. | Farmer identification                                          | Response |
|--------|------------------------------------------------|----------|--------|----------------------------------------------------------------|----------|
| A01    | Village                                        |          | A09    | No of years of formal education                                |          |
| A02    | Block                                          |          | A10    | No of years of farming experience                              |          |
| A03    | District                                       |          | A11    | Family size (Numbers)                                          |          |
| A04    | Mobile no.                                     |          | A12    | Membership in farmer organization/cooperative (Yes=1, No=2)    |          |
| A05    | Name of the farmer                             |          | A13    | Do you receive income from non-farm sources? (Yes=1, No=2)     |          |
| A06    | Gender (Male=1, Female=2)                      |          | A14    | Total farm land owned (ha)                                     |          |
| A07    | Age (Years)                                    |          | A15    | Total livestock units owned (number of farm animals owned)     |          |
| A08    | Category (General=1, SC/ST=2, OBC=3, Others=4) |          | A16    | Do you have attached labour for farm operations? (Yes=1, No=2) |          |
|        | Distance to the nearest agro-dealer (km)       |          |        | Distance to the nearest agricultural extension office (km)     |          |

**B: Cropping pattern**

| Crop    | Variety | Variety type<br>(1=Local, 2= HYV, 3=Hybrid) | Area planted<br>(hectares) | Quantity of seed used (kg) | Seed price (Rs/kg) | Season (1=Kharif, 2=Rabi, 3=Summer) |
|---------|---------|---------------------------------------------|----------------------------|----------------------------|--------------------|-------------------------------------|
| Maize   |         |                                             |                            |                            |                    |                                     |
| Sorghum |         |                                             |                            |                            |                    |                                     |

**C: Crop production and inputs (kg)**

| Crop    | Crop production (kg) | Chemical fertilizer quantity (kg) | Chemical fertilizer expenditure (Rs) | Organic/Bio fertilizer (Rs) | Pesticide/Insecticide (Rs) | Labour (Rs) |
|---------|----------------------|-----------------------------------|--------------------------------------|-----------------------------|----------------------------|-------------|
| Maize   |                      |                                   |                                      |                             |                            |             |
| Sorghum |                      |                                   |                                      |                             |                            |             |

**D: Farmers' awareness about Fall Army Worm (Yes/No)**

| Sl. No | Question                                            | Response (Yes=1, No=2) |
|--------|-----------------------------------------------------|------------------------|
| 1      | Are you aware about FAW?                            |                        |
| 2      | Have you observed infestation of FAW in your field? |                        |
| 3      | If yes then at which stage:                         |                        |
|        | Egg                                                 |                        |

|   |                                                                              |                      |  |
|---|------------------------------------------------------------------------------|----------------------|--|
|   |                                                                              | <i>Larva</i>         |  |
|   |                                                                              | <i>Pupa</i>          |  |
|   |                                                                              | <i>Adult</i>         |  |
| 4 | On which crop you have noticed the damage of FAW                             |                      |  |
|   |                                                                              | <i>Maize</i>         |  |
|   |                                                                              | <i>Sorghum</i>       |  |
|   |                                                                              | <i>Sugarcane</i>     |  |
|   |                                                                              | <i>Pulses</i>        |  |
|   |                                                                              | <i>Other cereals</i> |  |
|   |                                                                              | <i>Vegetables</i>    |  |
| 5 | Whether you know the origin of pest?                                         |                      |  |
| 6 | Can you differentiate the damage due to FAW and other <i>Spodoptera</i> sp.? |                      |  |
| 7 | Did you practice any control measures for FAW?                               |                      |  |
| 8 | I use my own sprayer for taking up control measure                           |                      |  |

**E. Farmers' response to FAW awareness statements (5 Point Likert Scale)**

| Sl No | FAW awareness statements                                                                 | Strongly agree | Somewhat agree | Don't know/Neutral | Somewhat disagree | Strongly disagree |
|-------|------------------------------------------------------------------------------------------|----------------|----------------|--------------------|-------------------|-------------------|
| 1     | FAW can be easily identified                                                             |                |                |                    |                   |                   |
| 2     | FAW invasion has made maize/sorghum cultivation difficult                                |                |                |                    |                   |                   |
| 3     | FAW invasion has reduced my crop yield                                                   |                |                |                    |                   |                   |
| 4     | Severity of <i>S. frugiperda</i> attack on maize/sorghum leaves is very high             |                |                |                    |                   |                   |
| 5     | Severity of <i>S. frugiperda</i> attack on maize/sorghum ear is very high                |                |                |                    |                   |                   |
| 6     | Spread of FAW increases with time in the cropping season                                 |                |                |                    |                   |                   |
| 7     | FAW invasion cannot be controlled without taking proper control measures                 |                |                |                    |                   |                   |
| 8     | Controlling FAW invasion is very difficult                                               |                |                |                    |                   |                   |
| 9     | I use seed treatment to manage FAW                                                       |                |                |                    |                   |                   |
| 10    | The cost of FAW control measures is very high                                            |                |                |                    |                   |                   |
|       | The existing FAW control measures are not effective                                      |                |                |                    |                   |                   |
| 11    | I prefer to change crop to avoid FAW infestation                                         |                |                |                    |                   |                   |
| 12    | I get sufficient information on FAW from public extension agencies                       |                |                |                    |                   |                   |
| 13    | I get sufficient information on FAW from private extension agencies/ SHGs                |                |                |                    |                   |                   |
| 14    | I get sufficient information on FAW from ICT (TV/Radio/News paper/ Internet/ Mobile etc) |                |                |                    |                   |                   |

|    |                                                        |  |  |  |  |  |
|----|--------------------------------------------------------|--|--|--|--|--|
| 15 | I get sufficient information on FAW from other farmers |  |  |  |  |  |
| 16 | I have attended training on FAW management             |  |  |  |  |  |

**F: Farmer perception about severity of damage to his crop area**

- a) A very minor part (<10% area infested)
- b) A minor part (10% to 40% area infested)
- c) About a half (41% to 60% area infested)
- d) A major part (61% to 90% area infested)
- e) The entire area (>90% area infested)

**G: Which method of control you mostly preferred for the management of FAW:**

- a) Pesticides
- b) Biologicals
- c) Use of pheromone trap
- d) Physical/cultural practices
- e) Pesticides + cultural practices
- f) Pesticides + biologicals
- g) Cultural + biologicals

**H: Which of the following practices were used for FAW control**

| Chemical measures   |                                 |                            | Physical/ cultural measures          |                                          |
|---------------------|---------------------------------|----------------------------|--------------------------------------|------------------------------------------|
| <i>Insecticide</i>  | <i>Frequency of application</i> | <i>Rate of application</i> | <i>Strategy followed</i>             | <i>Frequency (where ever applicable)</i> |
| Emamectin Benzoate  |                                 |                            | Hand picking caterpillars/egg masses |                                          |
| Chlorantraniliprole |                                 |                            | Sand/ash                             |                                          |
| Lambda Cyhalothrin  |                                 |                            | Early planting                       |                                          |
| Thiamethoxam        |                                 |                            | Soil fertility management            |                                          |
| Indoxacarb          |                                 |                            | Destroying infected plants           |                                          |
| Spinetoram          |                                 |                            | Crop rotation                        |                                          |
| Flubendiamide       |                                 |                            | Intercropping                        |                                          |
| Novaluron           |                                 |                            |                                      |                                          |
| Any other           |                                 |                            |                                      |                                          |

**I: In your opinion which is the most effective practice to control FAW**
